# Supplementary material for: Electronic structure of the ground and excited states of neutral and charged silicon hydrides, SiHx0/+/−, x = 1–4
Source: Royal Society of Chemistry journal article supplement (doi:10.1039/d2cp00956k), 2022-01-01
Supplement: d2cp00956k1.pdf [file d2cp00956k1.pdf]

# Electronic Supplementary Information

## Electronic structure of the ground and excited states of neutral and charged silicon hydrides, $\text{SiH}_x^{0/+/-}$ , $x=1-4$

*Emily E. Claveau,<sup>[1]</sup> Yeseul Choi,<sup>[2]</sup> Andrew J. Adamczyk,<sup>[2], †</sup> and Evangelos Miliordos<sup>[1], \*</sup>*

<sup>[1]</sup> Department of Chemistry and Biochemistry, Auburn University, Auburn, AL 36849-5312, USA

<sup>[2]</sup> Department of Chemical Engineering, Auburn University, Auburn, AL 36849-5312, USA

### Corresponding Author

\* E-mail: emiliord@auburn.edu

† E-mail: aja0056@auburn.edu

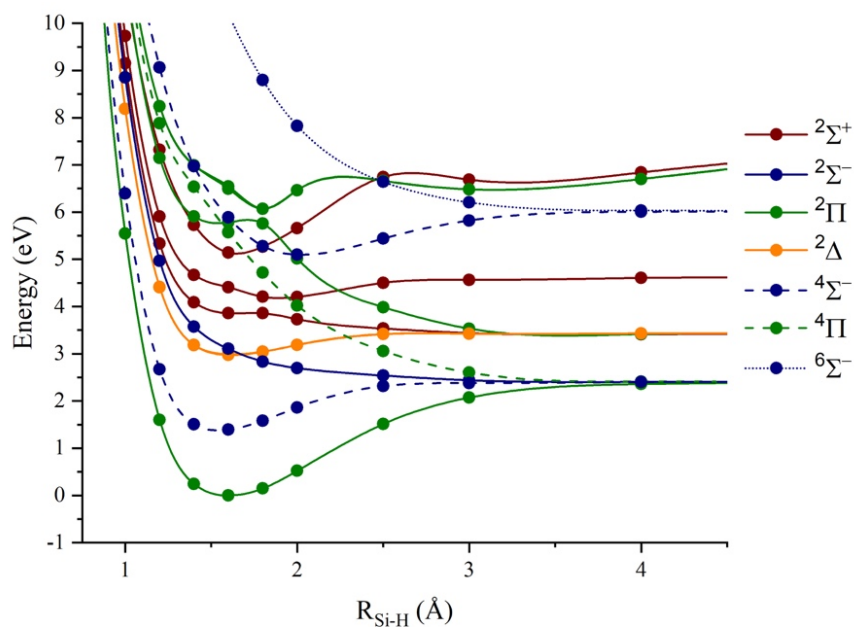

**Figure S1.** CASSCF potential energy curves for the low-lying states of SiH.

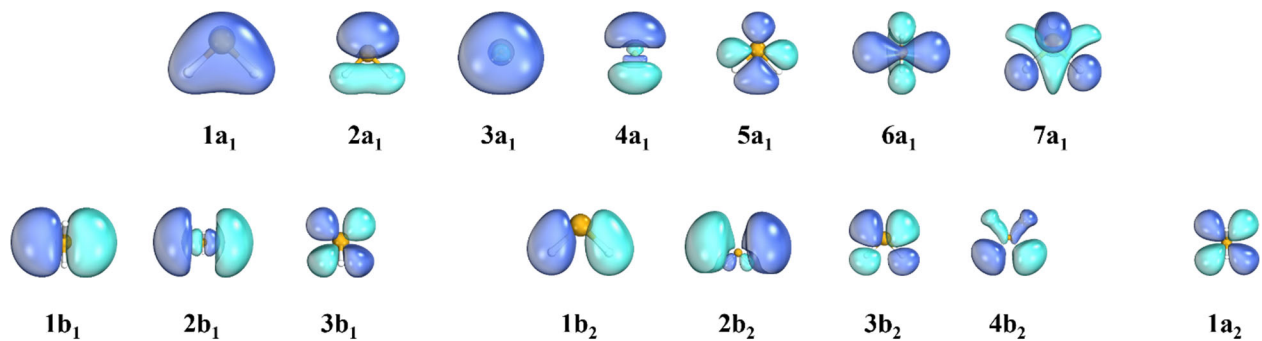

**Figure S2.** CASSCF active molecular orbitals of SiH<sub>2</sub>.

**Table S1.** SiH bond lengths  $r_e$  (Å) and HSiH angles  $\phi$  (degrees) for SiH<sub>3</sub><sup>0,±</sup> at CAM-B3LYP, MP2, and CCSD(T) levels of theory using aug-cc-pVTZ basis sets.

| Species                       | $r_e$ |           |         | $\phi$ |           |         |
|-------------------------------|-------|-----------|---------|--------|-----------|---------|
|                               | MP2   | CAM-B3LYP | CCSD(T) | MP2    | CAM-B3LYP | CCSD(T) |
| SiH <sub>3</sub> <sup>+</sup> | 1.462 | 1.467     | 1.468   | 120.0  | 120.0     | 120.0   |
| SiH <sub>3</sub>              | 1.478 | 1.481     | 1.484   | 111.2  | 111.1     | 111.2   |
| SiH <sub>3</sub> <sup>-</sup> | 1.535 | 1.538     | 1.544   | 95.5   | 95.3      | 95.2    |
